# Supplementary material for: Identification of Cilia in Different Mouse Tissues
Source: Cells. 2021 Jun 29;10(7):1623. doi: 10.3390/cells10071623 (PMC8307782; doi:10.3390/cells10071623)
Supplement: Supplementary file 1 [file cells-10-01623-s001.zip]

Archive with 6 entries (6 files):
- Supplementary figure1.tif
- Supplementary figure2.tif
- Supplementary figure3.tif
- Supplementary Vedio1.mp4
- Supplementary Vedio2.mp4
- Supplementary.pdf
